# Supplementary material for: Potential Hemostatic and Wound Healing Effects of Thermoresponsive Wound Dressing Gel Loaded with Lignosus rhinocerotis and Punica granatum Extracts
Source: MDPI journal article supplement (doi:10.3390/gels9010048), 2023-01-06
Supplement: s1 [file s1]

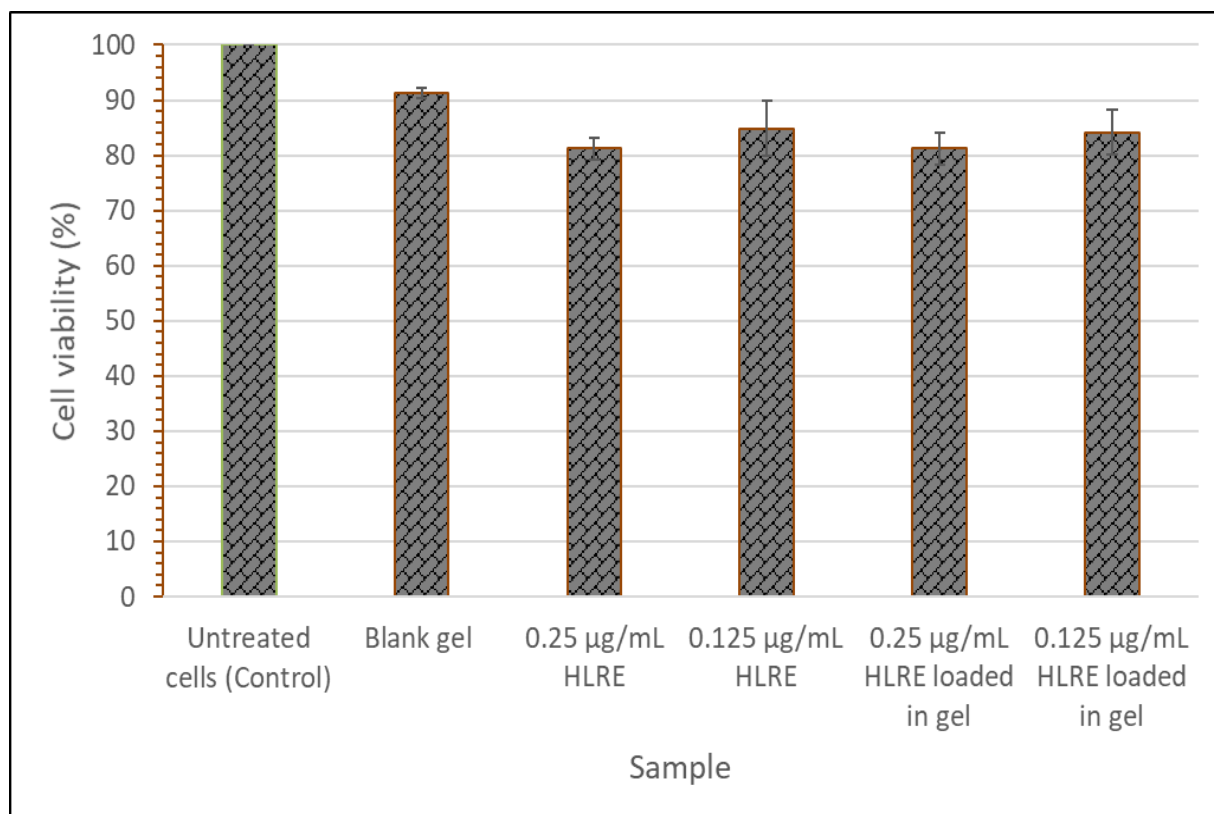

**Figure S1.** Cytotoxicity effect of thermoresponsive gels containing HLRE in normal human dermal fibroblasts (NHDF) as determined by AlamarBlue assay at 24 h of incubation, n=3. Footnote: Blank gel indicates unloaded thermoresponsive gels made of PF127 and PEG (F5); HLRE indicates hot extract of *L. rhinocerotis*

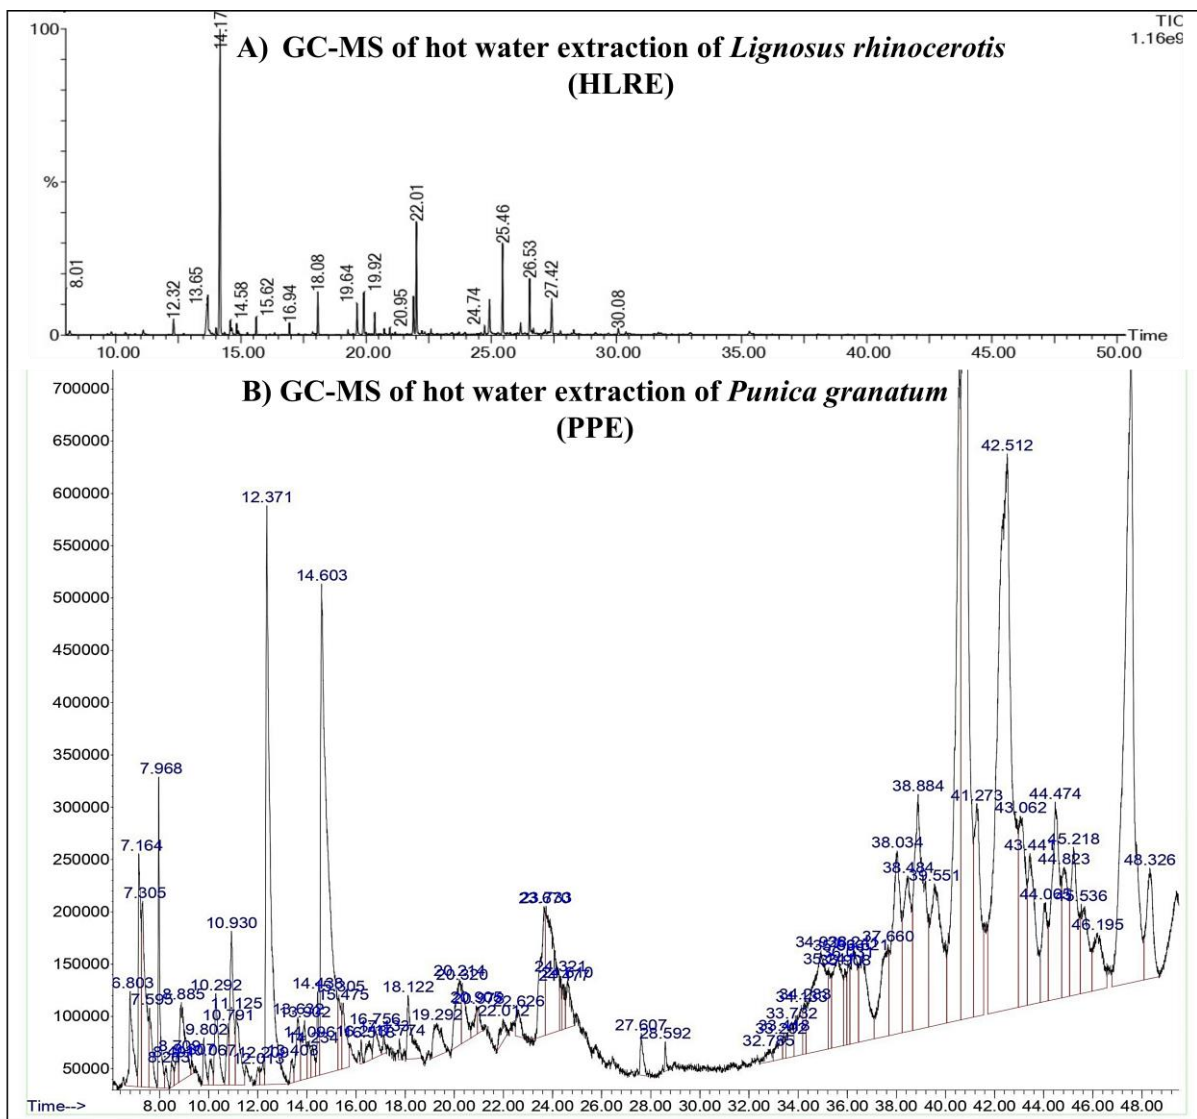

Figure S2. GC-MS analysis of HLRE (A) and PPE (B) .
